# Supplementary material for: A Mixed-Methods Exposé of Systemic Barriers and Enablers for Vitamin A and Deworming in Nigeria's Maternal Newborn and Child Health Week Programme
Source: Research Square preprint supplement (doi:10.21203/rs.3.rs-7532150/v1), 2025-11-11
Supplement: Supplementary file 1 [file ecb9378bcc459f2241947f2b.docx]

**HEALTH WORKER QUESTIONNAIRE**

**Q1: GENERAL INQUIRIES**

| **No.** | **QUESTIONS** | **ANSWERS** | **CODES** |
| --- | --- | --- | --- |
| **Q1.1** | Supervisor’s Name |  |  |
| **Q1.2** | Enumerator’s Name |  |  |
| **Q1.3** | Interview date and time | / / / /  (day) (month) (year) |  |
| **Q1.4** | State |  |  |
| **Q1.5** | LGA |  |  |
| **Q1.6** | Ward |  |  |
| **Q1.7** | Cluster name |  |  |
| **Q1.8** | Cluster setting | 1= rural 2= urban |  |
| **Q1.9** | Nature of cluster | 1=Normal 2=replacement |  |
| **Q1.10** | Name of health facility |  |  |
| **Q1.11** | Level of health facility | 1=Level 2-Dispensaries and clinics;  2=Level 3-Health facilities and maternity and nursing homes;  3=Level 4-General hospitals and medium-sized private hospitals;  4=Level 5- Referral hospitals and large private hospitals &  5=Level 6-National referral hospitals |  |
| **Q1.12** | What is your cadre | 1=Nurse 2=Nutritionist  3=Public health officers  4=Community health extension workers/CHA 5=Clinical Officers  6=Health records officers  7=State health management team  8=Sub-State health management team 9=Others specify……… |  |
| **Q1.13** | Name of last MNCHW in the facility or area |  |  |

**Q2: RESPONDENT PROFILE**

| **No.** | **QUESTIONS** | **ANSWERS** | **CODES** |
| --- | --- | --- | --- |
| **Q2.1** | Sex | 1=Male 2=Female  3=Transgender |  |
| **Q2.2** | What is your role in health facility? | 1=Nurse/Midwife 2=CHEW  3= CHO  4=Physician 4=Nutritionist 6=EPI Agent  7= Ward housekeeper  8=Senior health technician 9= Other, specify | Omit |
| **Q2.3** | How many years of experience do you  have in the health field in general? | (in years) |  |
| **Q2.4** | How many years of experience do you  have in your current position? | (in years) |  |

**Q3: KNOWLEDGE ON VITAMIN A**

| **No.** | **QUESTIONS** | **ANSWERS** | **CODES** |
| --- | --- | --- | --- |
| **Q3.1**  **Multiple** | What are your sources of information for vitamin A? | 1= MOH documents (yes/no) 2=Continuing training (yes/no)  3= TV (yes/no)  4=Radio (yes/no) 5=Newspapers (yes/no)  6= IEC materials (Poster, leaflet, data sheet) (yes/no)  7= Colleagues (yes/no)  8= Does not know (yes/no)  9= Other, specify |  |
| **Q3.2** | Have you received any training on vitamin A? | 1=Yes 0=No | If No sip to Q3.5 |
| **Q3.3** | How long has it been since you received the latest Vitamin A training? | 1= Less than 3 months  2=3 to 6 months  3=7 to 12 months 4=More than 1 year 5= I do not remember |  |
| **Q3.4** | How long did the training on Vitamin A last? | 1= Less than half day 2=Half a day  3= A day  4= Two days  5= Three days 6=Others |  |
| **Q3.5 Multiple** | What are the benefits of Vitamin A? | 1= Prevent illness (yes/no)  2= Foster/promote growth (yes/no)  3= Prevent blindness/foster vision (yes/no)  4= Improve health/immunity (yes/no) 5= Reduce death risk (yes/no)  6= Prevent anemia (yes/no) 7= Increase appetite (yes/no)  8= Does not know, does not remember (yes/no)  9= Other, specify |  |
| **Q3.6** | At what age should children receive Vitamin A for the first time? | 1= At birth  2= A 6 months  3= At 9 months  4= At 1 year 5=Does not know  6= Other, specify |  |
| **Q3.7** | How often should children aged 6-59 months receive vitamin A supplementation? | 1= During event (MNCH/VAS event, outreaches)  2= Quarterly  3= twice a year 4= Yearly  5= every day  6= I don’t know  7= Other, specify |  |
| **Q3.8**  **Multiple** | What is the vitamin A dose for children 6- 11 months old? | 1= One blue capsule 100.000 IU (yes/no)  2= One red capsule 200.000 IU (yes/no)  3= Half of the blue capsule 100.000 IU (yes/no)  4= Half of the red capsule 200.000 IU (yes/no)  5= I don’t know (yes/no)  6= Other, specify |  |
| **Q3.9** | What is the vitamin A dose for children 12- 59 months old? | 1= One blue capsule 100.000 UI  2= One red capsule 200.000 UI  3= 2 blue capsules 100.000 UI  4= 2 red capsules 200.000 UI  5= I don’t know  6= Other, specify |  |
| **Q3.10** | Do you have any (IEC) that talks about Vitamin A? | 1= yes  0= No | If No, Skip to Q4 |
| **Q3.11**  **Multiple** | Which of the IEC materials did you use during the just ended MNCH/VAS event? | 1= Flip charts/counselling cards (yes/no) 2=Training module (yes/no)  3= Poster on vitamin A (yes/no) 4=Vitamin A policy (yes/no)  5= Fact sheet (yes/no)  6= Other, specify |  |

**Q4: DEWORMING KNOWLEDGE**

| **No.** | **QUESTIONS** | **ANSWERS** | **CODES** |
| --- | --- | --- | --- |
| **Q4.1** | What are your sources of information on deworming? | 1= MOH documents (yes/no) 2= Continuing training (yes/no)  3= TV (yes/no)  4=Radio (yes/no) 5=Newspapers (yes/no)  6= IEC materials (Poster, leaflet, data sheet) (yes/no)  7= Colleagues (yes/no)  8= Does not know (yes/no) 9= Other, specify |  |
| **Q4.2** | Have you received any training on Deworming? | 1=Yes 0=No | If No sip to Q4.4 |
| **Q4.3** | How long has it been since you received the latest training on deworming? | 1=less than 3 months  2=3 to 6 months  3=7 to 12 months  4=More than 1 year  5= I don’t remember |  |
| **Q4.4** | What are the benefits of deworming? | 1= Treatment of intestinal parasites (yes/no)  2= Reduces Stomach pain (yes/no)  3= Protects against illnesses (yes/no)  4= Protects from anemia (yes/no)  5=Improve children’s health (yes/no)  6= Does not know (yes/no) 7= Others |  |
| **Q4.5** | At what age should children receive the deworming drug for the first time? | 1= Less than 6 months  2= At 6 months  3= At 1 year  4= More than 1 year  5= I don’t know  6= Other, specify |  |
| **Q4.6** | How often should children receive deworming drugs? | 1= During events  2= Quarterly  3= Twice a year 4= Yearly  5= I don’t know  6= Other, specify |  |
| **Q4.7** | Do you have (IEC) that talks about deworming? | 1=Yes 2= No | If No, skip to Q5 |
| **Q4.8**  **Multiple** | Which of the IEC materials did you use during the last health week/MNCH/VAS event? | 1= Flip charts/counselling cards (yes/no) 2=Training module (yes/no)  3= Poster on vitamin A (yes/no) 4=Vitamin A policy (yes/no)  5= Fact sheet (yes/no)  6= Other, specify |  |

**Q5: QUALITY ACTIVITIES OF THE EVENT**

| **No.** | **QUESTIONS** | **ANSWERS** | **CODES** |
| --- | --- | --- | --- |
| **Q5.1** | How many days did you participate in the MNCH week in your  State? | (in days) |  |
| **Q5.2** | How many hours a day? | 1=1 hour or less  2=2-3 hours  3= half a day  4= The whole day  5= Other |  |
| **Q5.3**  **Multiple** | What role did you play during the health week/MNCH/VAS event? | 1= Social mobilization (yes/no)  2= Vit A (yes/no)  3= Deworming distribution (yes/no)  4= Record (yes/no)  5= Supervisor (yes/no)  6= Data compilation (yes/no)  7= Malnutrition screening (yes/no)  8= Logistician (yes/no)  9= Others |  |
| **Q5.4** | Have there been any problems with vitamin A supply during the event? | 1= Yes  0= No | If No, skip to Q5.6 |
| **Q5.4a**  **Multiple** | If Yes, what were the challenges? | 1= Stock outs (yes/no)  2= Transport facilitation (yes/no) 3= Delay of supplies (yes/no)  4= Facilitation for supervision (yes/no) 5= Provision of documentation materials (yes/no)  6= Others specify (yes/no) |  |
| **Q5.5** | If YES, have these problems been solved? | 1= Yes 2=Partially 3= No  4= Does not know |  |
| **Q5.6** | Have there been any problems with the supply of de-worming during the event? | 1= Yes  0= No | If No skip to end |
| **Q5.6a**  **Multiple** | If Yes, what were the challenges? | 1= Stock outs (yes/no)  2= Transport facilitation (yes/no) 3= Delay of supplies (yes/no)  4= Facilitation for supervision (yes/no) 5= Provision of documentation materials (yes/no)  6= Others specify (yes/no) |  |
| **Q5.7** | If YES, have these problems been solved? | 1= Yes 2=Partially 3= No  4= Does not know |  |

| **Q5.8a**  **Multiple** | How do you think vitamin A supplementation could be improved in your area? | 1= Mass-media campaigns (yes/no)  2= Households heads sensitization (yes/no)  3= Better coordination between community and health staff (yes/no)  4= Ensure Vit A is sufficient and prompt supply (yes/no)  5= A regular training of workers (yes/no)  6= Health workers’ motivation(yes/no)  7= CHV motivation (yes/no) 8= Does not know (yes/no)  9= Other |  |
| --- | --- | --- | --- |
| **Q5.8b**  **Multiple** | How do you think deworming distribution could be improved in your area? | 1= Mass-media campaigns (yes/no) 2= Households heads sensitization (yes/no)  3= Better coordination between community and health staff (yes/no) 4= Ensure deworming drugs are sufficient and prompt supply (yes/no) 10= Ensure Deworming drugs are sufficient and prompt supply (yes/no) 5= A regular training of workers (yes/no)  6= Health workers’ motivation(yes/no) 7= CHV motivation (yes/no)  8= Does not know (yes/no)  9= Other |  |

Take GPS Coordinates of the household

(Should be taken from outside the health facility building and accuracy should be at least 5 meters or less)

***Thank you for your collaboration***

**COMMUNITY HEALTH VOLUNTEER QUESTIONNAIRE**

**Q1: GENERAL INQUIRIES**

| **No.** | **QUESTIONS** | **ANSWERS** | **CODES** |
| --- | --- | --- | --- |
| **Q1.1** | Supervisor’s Name |  |  |
| **Q1.2** | Enumerator’s Name |  |  |
| **Q1.3** | Interview date and time | / / / /  (day) (month) (year) |  |
| **Q1.4** | State |  |  |
| **Q1.5** | LGA |  |  |
| **Q1.6** | Ward |  |  |
| **Q1.7** | Cluster name |  |  |
| **Q1.7b** | Cluster setting | 1= rural 2= urban |  |
| **Q1.8** | Nature of cluster | 1= Sampled cluster 2=replacement |  |
| **Q1.9** | Name of the community unit |  |  |
| **Q1.10** | Name of health facility |  |  |
| **Q1.11** | Level of health facility | 1=Level 2-Dispensaries and clinics;  2=Level 3-Health facilities and maternity and nursing homes;  3=Level 4-Sub-State hospitals and medium-sized private hospitals;  4=Level 5-State referral hospitals and large private hospitals |  |

**Q2: RESPONDENT PROFILE**

| **No.** | **QUESTIONS** | **ANSWERS** | **CODES** |
| --- | --- | --- | --- |
| **Q2.1** | Sex | 1=Male 2=Female  3=Transgender |  |
| **Q2.2** | What is your highest level of education attained? | 1=None  2=Did not complete primary school 3= Completed primary school  4= Did not complete Secondary school  5= Completed secondary school  6= Did not complete tertiary education  7= Completed tertiary education |  |
| **Q2.3** | How many years of experience do you have as a community health volunteer  in general? | (in years) |  |
|  | How many years of experience do you have as a community health volunteer  in this health facility? |  |  |

**Q3: KNOWLEDGE ON VITAMIN A AND VAS**

| **No.** | **QUESTIONS** | **ANSWERS** | **CODES** |
| --- | --- | --- | --- |
| **Q3.1**  **Multiple** | What are your sources of information for vitamin A? | 1= MOH documents (yes/no) 2= Continuing training (yes/no) 3= TV (yes/no)  4=Radio (yes/no) 5=Newspapers (yes/no)  6= IEC materials (Poster, leaflet, data sheet) (yes/no)  7= Colleagues (yes/no)  8= Does not know (yes/no) 9= Other, specify |  |
| **Q3.2** | Have you received any training on vitamin A? | 1=Yes 0=No | If No, Skip to Q3.5 |
| **Q3.3** | How long has it been since you received the latest Vitamin A training? | 1= Less than 3 months  2=3 to 6 months  3=7 to 12 months 4=More than 1 year 5= I do not remember |  |
| **Q3.4** | How long did the training on Vitamin A last? | 1= Less than half day 2=Half a day  3= A day  4= Two days  5=Others |  |
| **Q3.5** | What are the benefits of vitamin A? | 1= Prevent illness (yes/no)  2= Foster/promote growth (yes/no)  3= Prevent blindness/foster vision (yes/no)  4= Improve health/immunity (yes/no) 5= Reduce death risk (yes/no)  6= Prevent anemia (yes/no) 7= Increase appetite (yes/no)  8= Does not know, does not remember (yes/no)  9= Other, specify |  |
| **Q3.6** | At what age should children receive vitamin A for the first time? | 1= At birth  2= A 6 months  3= At 9 months  4= At 1 year 5=Does not know  6= Other, specify |  |
| **Q3.7** | How often should children aged 6-59 months receive vitamin A supplementation? | 1= During events (MNCH/VAS event, outreaches)  2= Quarterly 3= twice a year 4= Yearly  5= every day  6= I don’t know  7= Other, specify |  |
| **Q3.8**  **Multiple** | What is the vitamin A dose for children 6- 11 months old? | 1= One blue capsule 100.000 IU (yes/no) 2= One red capsule 200.000 IU (yes/no) 3= Half of the blue capsule 100.000 IU (yes/no)  4= Half of the red capsule 200.000 IU (yes/no)  5= I don’t know (yes/no)  6= Other, specify |  |
| **Q3.9** | What is the vitamin A dose for children 12- 59 months old? | 1= One blue capsule 100.000 IU  2= One red capsule 200.000 IU  3= 2 blue capsules 100.000 IU  4= 2 red capsules 200.000 IU  5= I don’t know  6= Other, specify |  |
| **Q3.10** | Do you have any equipment (IEC) that talks about Vitamin A? | 1= yes  0= No | If No, skip to Q4 |
| **Q3.11**  **Multiple** | Which of the IEC materials did you use during the last MNCH/VAS event? | 1= Flip charts/counselling cards (yes/no) 2=Training module (yes/no)  3= Poster on vitamin A (yes/no) 4=Vitamin A policy (yes/no)  5= Fact sheet (yes/no)  6= Other, specify |  |

**Q4: DEWORMING KNOWLEDGE**

| **No.** | **QUESTIONS** | **ANSWERS** | **CODES** | |  |
| --- | --- | --- | --- | --- | --- |
| **Q4.1**  **Multiple** | What are your sources of information on deworming? | 1= MOH documents (yes/no) 2= Continuing training (yes/no) 3= TV (yes/no)  4=Radio (yes/no) 5=Newspapers (yes/no)  6= IEC materials (Poster, leaflet, data sheet) (yes/no)  7= Colleagues (yes/no)  8= Does not know (yes/no) 9= Other, specify |  | |
| **Q4.2** | How long has it been since you received the latest training on deworming? | 1=less than 3 months 2=3 to 6 months  3=7 to 12 months 4=More than 1 year  5= I don’t remember |  | |
| **Q4.3**  **Multiple** | What are the benefits of deworming? | 1= Treatment of intestinal parasites (yes/no) 2= Reduces Stomach pain (yes/no)  3= Protects against illnesses (yes/no) 4= Protects from anemia (yes/no)  5=Improve children’s health (yes/no)  6= Does not know (yes/no) 7= Others |  | |
| **Q4.4** | At what age should children receive the deworming drugs for the first time? | 1= Less than 6 months  2= At 6 months  3= At 1 year  4= More than 1 year  5= I don’t know  6= Other, specify |  | |
| **Q4.5** | How often should children receive vitamin A supplementation? | 1= During events  2= Quarterly 3= Twice a year 4= Yearly  5= I don’t know  6= Other, specify |  | |
| **Q4.6** | Do you have (IEC) equipment that talks about deworming? | 1=Yes 2= No | If No skip to Q5 | |
| **Q4.7** | Which of the IEC materials did you use during the last health week/MNCH/VAS event? | 1= MOH documents (yes/no) 2= Continuing training (yes/no) 3= TV (yes/no)  4=Radio (yes/no) 5=Newspapers (yes/no)  6= IEC materials (Poster, leaflet, data sheet) (yes/no)  7= Colleagues (yes/no)  8= Does not know (yes/no) 9= Other, specify |  |

**Q5: QUALITY ACTIVITIES OF THE EVENT**

| **No.** | **QUESTIONS** | **ANSWERS** | **CODES** |
| --- | --- | --- | --- |
| **Q5.1** | How many days did you participate in the just ended MNCH/VAS event in your State? | (in days) |  |
| **Q5.2** | On average how many hours a day did you participate in the just ended MNCH/VAS event? | 1=1 hour or less 2=2-3 hours  3= half a day  4= The whole day  5= Other |  |
| **Q5.3**  **Multiple** | What role did you play during the event? | 1= Social mobilization (yes/no)  2= Vit A and Deworming distribution (yes/no)  3= Record (yes/no)  4= Supervisor (yes/no)  5= Data compilation (yes/no)  6= Malnutrition screening (yes/no) 7= Logistician (yes/no)  8= Others |  |
| **Q5.4** | Have there been any problems with vitamin A supply during the event? | 1= Yes  0= No | If No Skip to Q5.6 |
| **Q5.4a**  **Multiple** | If Yes, what are the challenges? | 1= Stock outs (yes/no)  2= Transport facilitation (yes/no) 3= Delay of supplies (yes/no)  4= Facilitation for supervision (yes/no) 5= Provision of documentation materials (yes/no)  6= Others specify (yes/no) |  |
| **Q5.5** | If YES, have these problems been solved? | 1= Yes 2=Partially 3= No  4= Does not know |  |
| **Q5.6** | Have there been any problems with the supply of de-worming during the event? | 1= Yes  0= No | If No skip to end |
| **Q5.6a**  **Multiple** | If Yes, what were the challenges? | 1= Stock outs (yes/no)  2= Transport facilitation (yes/no) 3= Delay of supplies (yes/no)  4= Facilitation for supervision (yes/no) 5= Provision of documentation materials (yes/no)  6= Others specify (yes/no) |  |
| **Q5.7** | If YES, have these problems been solved? | 1= Yes 2=Partially 3= No  4= Does not know |  |
| **Q5.8a**  **Multiple** | How do you think that vitamin A supplementation and deworming distribution could be improved in your area? | 1= Mass-media campaigns (yes/no) 2= Households heads sensitization (yes/no)  3= Better coordination between community and health staff (yes/no) 4= Ensure Vat A sufficient and prompt supply (yes/no)  5= A regular training of workers (yes/no)  6= Health workers’ motivation(yes/no)  7= CHV motivation (yes/no) 8= Does not know (yes/no)  9= Other |  |
| **Q5.8b**  **Multiple** | How do you think that vitamin A supplementation and deworming distribution could be improved in your area? | 1= Mass-media campaigns (yes/no) 2= Households heads sensitization (yes/no)  3= Better coordination between community and health staff (yes/no) 4= Ensure Vat A sufficient and prompt supply (yes/no)  5= A regular training of workers/ CHVs(yes/no)  6= CHV/Health workers’  motivation(yes/no)  7= CHV motivation (yes/no) 8= Does not know (yes/no)  9= Other |  |

Take GPS Coordinates of the household (Should be taken from outside the health facility building and accuracy should be at least 5 meters or less)

***Thank you for your collaboratin******g***

**CHILD QUESTIONNAIRE**

If the household has more than one eligible child, get the information for all the eligible children (child 1, child 2, child 3…)

**Q2: VITAMIN A SUPPLEMENTATION**

| **No.** | **QUESTIONS** | **ANSWERS** |  |
| --- | --- | --- | --- |
| **Q2.1** | What is the sex of the child? | 1=Male 2=Female |  |
| **Q2.2** | When is the child’s date of birth? | The date must be between November, 2019 and May, 2024 (update according to the health week date) |  |

|  |  | Can we have the month generated automatically after inserting the year of birth? |  |
| --- | --- | --- | --- |
| **Q2.3** | What is the source of this information? | 1=Health record 2=Birth certificate 3=Events calendar  4=Other to specify |  |
| **Q2.4** | During the health week event of November 2024 which has just ended, did the child receive vitamin A? (Show capsules or a picture of vitamin A) | 1= Yes 0=No  3= Does not know | If No Skip to Q2.6 |
| **Q2.5** | If yes where did (s)he receive it (place)? | 1= Here at home (Yes/no)  2= Health facility (Yes/no)  3=School (ECDE) (Yes/no)  4=Another place outside the village (Yes/no) 5=Does not know (Yes/no)  6=Other, specify |  |
| **Q2.6** | If no why didn’t the child receive this product  during this health week event of November 2024? | 1= the child was absent 2= workers did not come 4= not informed  5= the child was ill  6= refusal  7=lack of products  8=does not remember/ does not know/ does not remember anymore  9= other, specify |  |
| **Q2.7** | Also if no, did the child receive Vitamin A any other time since 1st January 2024? | 1= Yes 0=No  3= Does not know | If No Skip to  Q2.9 |
| **Q2.8** | If yes, where did the child receive? | 1= Here at home (Yes/no)  2= Health facility (Yes/no)  3=School (ECDE) (Yes/no)  4=Another place outside the village (Yes/no) 5=Does not know (Yes/no)  6=Other, specify |  |
| **Q2.9** | Has your child (index child/children) been to a health facility or a community outreach between January 1st till now? | 1= Yes 0=No |  |
| **Q2.10**  **Multiple** | If yes what services did they receive? | 1=Immunization (Yes/no) 2=Deworming (Yes/no) 3=VAS (Yes/no)  4=Outpatient-treatment (Yes/no) 5=Inpatient (Yes/no)  6=Growth monitoring (Yes/no) |  |

**Q3: DEWORMING**

| **Q3.1** | During the health week event of November 2024 which has just been completed, has the child received the deworming? (show a tablet or deworming photo) | 1=Yes 0=No  2= Does not know | If No Skip to Q3.3 |
| --- | --- | --- | --- |
| **Q3.2** | If yes where did (s) he receive it? | 1= Here at home (Yes/no) 2= Health facility (Yes/no) 3=School (ECDE) (Yes/no)  4=Another place outside the village (Yes/no) 5=Does not know (Yes/no)  6=Other, specify |  |
| **Q3.3** | If no, why did not the child receive the product in this health week event? | 1= the child was absent 2= workers did not come  3= Workers did not come any longer 4= not informed  5= the child was ill 6= refusal  7=lack of products  8=does not remember/ does not know/ does not remember anymore  9= other, specify |  |
| **Q3.4** | Also, if no, did the child receive deworming drugs any other time since  1st January 2024? | 1= Yes 0=No  3= Does not know | If No Skip to Q4 |
| **Q3.5** | If yes, where did the child receive? | 1= Here at home (Yes/no) 2= Health facility (Yes/no) 3=School (ECDE) (Yes/no)  4=Another place outside the village (Yes/no) 5=Does not know (Yes/no)  6=Other, specify |  |

**Q4: ENUMERATOR OBSERVATION/MARKING**

| **Enumerator's observation (Optional question if country strategy provides marking)** | | | |
| --- | --- | --- | --- |
| **Q4.1** | Did the enumerator see the child during the visit? | 1=Yes 0=No | If No Skip to Household Questionnaire |
| **Q4.2** | Did the child have a mother and child health card? (*confirm availability*)? | 1=Yes 0=No |  |

**HOUSEHOLD QUESTIONNAIRE**

**Q1: RESPONDENT PROFILE**

| **No.** | **QUESTIONS** | **ANSWERS** | **CODES** |
| --- | --- | --- | --- |
| **Q1.1** | Family relationship with the child | 1=Father 2= Mother  3= Uncle 4= Aunt  5= Guardian 6= Grandfather 7=Grandmother 8=Other (Specify)……………… |  |
| **Q1.2** | Sex | 1=Male 2=Female  3=Transgender |  |
| **Q1.3** | How old are you? | / /years |  |
| **Q1.4** | What is your highest education level attained? | 1=None  2=Did not complete primary school 3= Completed primary school  4= Did not complete Secondary school  5= Completed secondary school  6= Did not complete tertiary education  7= Completed tertiary education |  |
| **Q1.5** | What do you do for a living? | 1= Public sector worker 2= Private sector worker 3=Storekeeper 4=Farmer  5=Housewife (housekeeper) 6= Craftsman/Liberal activity  7= Jobless/Unemployed  8= Retired  9= Pupil/Student  10= Other to specify |  |

**Q2: HOUSEHOLD CHARACTERISTICS**

| **No.** | **QUESTIONS** | **ANSWERS** | **CODES** |
| --- | --- | --- | --- |
| **Q2.1** | What is the main current source of the water in this household? | 1=Tap water (private)  2= Tap water (public)  3=Public protected well 4=Private protected well  5= Public unprotected well 6=Private unprotected well  7=Surface water (lake, river, pond, stream ...)  8=Purchase of conditioned water  9=Drilling  10=Other, specify………………………… |  |
| **Q2.2** | Where do you relieve yourself? | 1= Bush  2=Public toilets  3=Pit latrine  4= Flush Toilet  5=Neighbour’s toilet  8=Other (Specify)………………………… |  |
| **Q2.3** | What types of fuels do you use to make food? | 1=Firewood  2=Charcoal  3=Gas  4=Other specify……… |  |
| **Q2.4** | Main building materials of the walls of the house (according to your observation) | 1=Bare ground house 2=Wooden house  3= Cement house  4=Other: ………………………………………… |  |
| **Q2.5** | Main building materials of the roof of the house (according to your observation) | 1=Roof plate 2=Concrete slab 3=Tiled roof 4=Grassed roof  5=Other …………………………………………… |  |
| **Q2.6** | Main building materials of the floor of the house (according to your observation) | 1=Dirt floor  2= Cement floor 3=Tiled floor  4=Other |  |
| **Q2.7** | Do you have or somebody in the household with one of the following and functioning objects? | 1=Radio  2=Television  3=Telephone  4=Motorbike  5= Bicycle  6= Car or lorry  7=Fan  8=Air conditioner  9= Other …………………………………… |  |
|  | What is your religion? | Muslim 1  Christian 2  Traditional 3  No religion 4  Other, specify:______________ |  |
|  | How many are household members are in your house including you? | Integer |  |
|  | How many children under 5 do you have in the house? | Integer |  |

**Q3: ACCESS TO HEALTH SERVICES**

| **No.** | **QUESTIONS** | **ANSWERS** | **CODES** |
| --- | --- | --- | --- |
| **Q3.1** | Has your child been sick in the last two weeks? | 1= Yes  2= No  3= I don’t know | If No, skip to 3.2 |
| **Q3.1a** | If yes, what was the child suffering from? | 1=Malaria 2=Diarrhoea 3=Pneumonia 4=Cough  5= Stomach ache  6= Others specify……………. |  |
| **Q3.2**  **Multiple** | Have you ever taken your child to the health centre just to receive one of the following services? | 1=Vaccination (yes/no)  2=Vitamin A supplementation (yes/no) 3=Deworming (yes/no)  4=Growth monitoring (yes/no) 4=Other ……………………………………………. |  |

**Q4: MNCH WEEK/VAS COMMUNICATION STRATEGY**

| **No.** | **QUESTIONS** | **ANSWERS** | **CODES** |
| --- | --- | --- | --- |
| **Q4.1** | Have you been informed of the holding of the VAS mass event before its beginning in of November 2024? | 1= Yes  0= No | If No, skip to 5.1 |
| **Q4.2**  **Multiple** | How were you informed about the MNCH week/VAS campaign?  *(Several possible answers, surround the code (s) then sum)* | 1= Public address system(yes/no) 2= Health workers (yes/no)  3= CHV (yes/no)  4= Volunteer (yes/no)  5= Person in the household (yes/no) 6= Neighbourhood (yes/no)  7= Radios (yes/no)  8= Television (yes/no)  9= Posters (yes/no)  10= Community/religious leaders (yes/no) 11= Others specify |  |

**Q5: VITAMIN A AND DEWORMING LEVEL OF KNOWLEDGE**

| **No.** | **QUESTIONS** | **ANSWERS** | **CODES** |
| --- | --- | --- | --- |
| **Q5.1** | Do you know what this product is called? (Vitamin A) (show the 2 types of capsules or photo of vitamin A) | 1= Yes  0= No | If No, skip to 5.3 |
| **Q5.2**  **Multiple** | Do you know (the benefits) what this product is for? (strengthening of the immune system, prevention of crepuscular blindness) | 1= Prevents blindness / helps with vision (see well) (yes/no)  2= Fosters growth (yes/no)  3= Protects against illnesses (yes/no) 4=Protects against anaemia (yes/no) 5=Reduce death risk (yes/no)  6=Improve children’s health (yes/no)  7= Does not know (yes/no)  8= Others |  |
| **Q5.3** | At what age should children receive their first dose of vitamin A? | 1= Less than 6 months  2= At six months  3= Over 6 months  4= Does not know  5= Other………………………………. |  |
|  | At what age does a child no longer qualify to receive Vitamin A supplement? |  |  |
| **Q5.4** | How many times should a child receive vitamin A per year? | 1= Once  2= Twice  3= 3 times  4= Does not know 5= Others |  |
| **Q5.5**  **Multiple** | With whom / Where did you get your knowledge (information) about vitamin A? | 1= Health workers (yes/no) 2= CHV (yes/no)  3=Radio (yes/no)  4=TV (yes/no)  5=Other………………… |  |
|  | What would help to support or motivate you to continue to bring your child for vitamin A supplementation? |  |  |
| **Q5.6** | Do you know what this product is called? (de- worming drug) (show the deworming drug sample or photo) | 1= Yes  0= No | If No, skip to 5.8 |
| **Q5.7**  **Multiple** | Do you know what this product is for (de- worming)?  (Prevention / treatment of diarrhoea /of intestinal or water-related diseases) | 1= Treatment of intestinal worms (yes/no) 2= Stomach pain (yes/no)  3= Protects against illnesses (yes/no) 4= Protects against anaemia (yes/no) 5=Improve children’s health (yes/no) 6= Does not know (yes/no)  7= Others |  |
| **Q5.8** | At what age should children receive this product? | 1= Less than 6 months  2= At 6 months  3= At 12 months 4= Does not know  5= Other ………………………………. |  |
|  | At what age does a child no longer qualify to receive deworming tablet? |  |  |
| **Q5.9** | How many times per year should a child receive deworming drug? | 1= Once  2= Twice  3= 3 times  4= Does not know  5= Other ……… |  |
|  | What would help to support or motivate you to continue to bring your child for deworming? |  |  |

**Q6: QUALITY OF VITAMIN A AND DEWORMING ADMINISTRATION ACTIVITIES**

| **No.** | **QUESTIONS** | **ANSWERS** | **CODES** |
| --- | --- | --- | --- |
| **Q6.1**  **Multiple** | What did the administrator agent tell you about the vitamin A he/she gave to your children? | 1= Protects eyesight  2= Promotes Growth 3= It improves health 4= Doesn’t know  5= Others |  |
|  | Were you allowed to ask any questions? | Yes  No  Don't know  Refuse to answer |  |
|  | Do you think Vitamin A supplement is easily accessible to you? | Yes  No  Don't know  Refuse to answer |  |
| **Q6.2** | What did the administrator agent tell you about the deworming he gave to your children? | 1= Eliminates worms  2= Controls anaemia  3= Improves health  4= Doesn’t know  5= Others |  |
|  | Were you allowed to ask any questions? | Yes  No  Don't know  Refuse to answer |  |
|  | Do you think deworming tablet is easily accessible to you? | Yes  No  Don't know  Refuse to answer |  |

Take GPS Coordinates of the household

(Should be taken from outside the house and accuracy should be at least 5 meters or less)

**COMMUNITY LEADER’S QUESTIONNAIRE**

**To be administered to community leaders in sampled enumeration areas**

**GENERAL ENQUIRIES**

| **No.** | **QUESTIONS** | **ANSWERS** | **CODES** |
| --- | --- | --- | --- |
| **Q1.1** | Supervisor Name |  |  |
| **Q1.2** | Supervisor code |  |  |
| **Q1.3** | Enumerator Name |  |  |
| **Q1.4** | Enumerator code |  |  |
| **Q1.5** | Interview date and time | / / / /  (day)(month)(year) |  |
| **Q1.6** | State |  |  |
| **Q1.7** | LGA |  |  |
| **Q1.8** | Ward |  |  |
| **Q1.9** | Village |  |  |
| **Q1.10** | EA/Cluster name |  |  |
| **Q1.11** | EA/Cluster setting | 1= rural 2= urban |  |
| **Q1.12** | Nature of EA/cluster | 1=Normal 2=replacement |  |
| **Q1.13** | Interview date and time | / / / /  (day)(month)(year) |  |

| **No.** | **Questions** | **Options** |
| --- | --- | --- |
| **1** | How would you describe the overall state of child health in your community? | 1 = Very poor  2 = Poor  3 = Fair  4 = Good  5 = Very good |
| **2** | How would you rate community awareness of vitamin A supplementation and deworming programs? | 1 = Very low  2 = Low  3 = Moderate  4 = High  5 = Very high |
| **3** | What are the primary challenges your community faces in accessing healthcare? (Select all that apply) | 1 = Lack of awareness  2 = Financial constraints  3 = Distance to health facilities  4 = Inadequate health staff  5 = Insufficient supplies  6 = Other (Specify) |
| **4** | In your opinion, how effective have vitamin A and deworming initiatives been in improving child health? | 1 = Not effective at all  2 = Slightly effective  3 = Moderately effective  4 = Very effective  5 = Extremely effective |
| **5** | Which groups in your community benefit most from health initiatives like vitamin A supplementation? (Select all that apply) | 1 = Infants (0-1 year)  2 = Young children (1-5 years)  3 = Pregnant women  4 = Low-income families  5 = Families with many children  6 = Other (Specify) |
| **6** | What other health programs are essential to support alongside vitamin A and deworming? (Select all that apply) | 1 = Immunizations  2 = Nutritional support  3 = Water, Sanitation, and Hygiene (WASH)  4 = Maternal health services  5 = Other (Specify) |
| **7** | How well was the last MNCH (Maternal, Newborn, and Child Health) week organized in your community? | 1 = Very poorly  2 = Poorly  3 = Fairly  4 = Well  5 = Very well |
| **8** | In what ways do community health volunteers contribute to the success of these health programs? (Select all that apply) | 1 = Social mobilization  2 = Distribution of vitamin A and deworming drugs  3 = Record-keeping  4 = Health screenings  5 = Supervising events  6 = Other (Specify) |
| **9** | How involved is the community in the planning and implementation of health programs like vitamin A supplementation? | 1 = Not involved  2 = Slightly involved  3 = Moderately involved  4 = Highly involved  5 = Fully involved |
| **10** | Have there been any challenges with vitamin A or deworming drug supplies during recent events? | 1 = Yes, 0 = No |
| **10a** | If Yes, what were the challenges? (Select all that apply) | 1 = Stock-outs  2 = Transportation issues  3 = Delayed supplies  4 = Lack of supervision  5 = Inadequate documentation materials  6 = Other (Specify) |
| **11** | What would improve the effectiveness of vitamin A and deworming distributions in your area? (Select all that apply) | 1 = Media campaigns  2 = Sensitization of household heads  3 = Enhanced coordination between community and health staff  4 = Prompt and sufficient supply of supplements  5 = Regular training for health workers  6 = Increased motivation for health workers and CHVs  7 = Other (Specify) |
| **12** | Which methods are most effective for raising community awareness of health programs? (Select all that apply) | 1 = Community meetings,  2 = Radio announcements  3 = Posters and leaflets  4 = Social media  5 = SMS notifications  6 = Other (Specify) |
| **13** | How motivated do you feel health workers and volunteers are in implementing these programs? | 1 = Not motivated at all  2 = Slightly motivated  3 = Moderately motivated  4 = Highly motivated  5 = Extremely motivated |
| **14** | What role should community leaders play to enhance health programs like vitamin A and deworming? (Select all that apply) | 1 = Facilitating awareness programs  2 = Coordinating community members with health staff  3 = Assisting in planning and logistics  4 = Monitoring program quality  5 = Advocating for additional resources  6 = Other (Specify) |

Thank you for your time

**KEY INFORMANT INTERVIEW GUIDE**

**Sociodemographic Details (for all participants)**

Moderator/Notetaker: *Please complete this table prior to the interview.*

| **Question** | **Response** |
| --- | --- |
| Name and Position |  |
| Current role? |  |
| Age |  |
| Years of Experience |  |
| Religion |  |
| How long have you been in this position? |  |
| What specific responsibilities do you have related to the Vitamin A and deworming programs? |  |
| Which organization do you represent? |  |
| In which state or region do you primarily work (for state-level) / oversee or coordinate (for national-level)? |  |

**STATE-LEVEL**

**Assessing Coverage of Vitamin A Supplementation and Deworming**

1. How successful has the Vitamin A supplementation campaign and deworming programs been in reaching children aged 6-59 months and 12 – 59 months respectively in your state?

Probe for reach and access, community awareness

1. What factors contributed to the current coverage level for Vitamin A supplementation and deworming interventions in this region? Probe for challenges health workers encountere while delivering vitamin A and deworming services in your communities
2. What strategies do you employ to mitigate missed opportunities?
3. Are there specific communities or demographics where deworming coverage is notably higher or lower? Why is it so?

**Validation of Administrative Data**

1. Are the administrative data a reflection of the actual coverage for Vitamin A and deworming services?
2. What discrepancies, if any, have you observed between administrative records and the post-event coverage survey findings?

**Coverage of Other Health and Nutrition Services**

1. Besides Vitamin A and deworming, what other health or nutrition services are provided for children under five and women of reproductive age during the MNCH week?

***If none, skip question 7a.***

- 1. What strategies do you employ to mitigate missed opportunities?

**Understanding of Uptake and Barriers**

1. Please describe the primary factors that you believe impact the uptake of vitamin A supplementation and deworming services by women and children in your state? Probe for knowledge, attitudes and practices of community members that may lead to caregivers hesitating in bringing their children from these services

**Community Engagement and Awareness**

1. How are communities typically informed about the availability and benefits of vitamin A and deworming services?
2. What role do community leaders or local organizations play in encouraging families to access these services?

**Logistical and Resource Constraints**

1. What logistical or resource limitations do you face in delivering vitamin A and deworming services? Probe for transport, staffing, supply availability
2. How do these limitations impact service reach, especially in hard-to-access areas?

**Opportunities for Improvement**

1. What improvements or additional resources would enhance the effectiveness of vitamin A and deworming programs in your state?
2. What specific strategies could be implemented to increase coverage rates?

**End of Interview**

Thank Participant for their time

**NATIONAL-LEVEL**

**Assessing National Coverage of Vitamin A Supplementation and Deworming Intervention**

1. At the national level, what trends have you observed in the coverage Vitamin A supplementation (VAS) and deworming intervention?
   1. How do different States or regions compare in terms of coverage?
   2. What do you attribute these differences to?
2. What mechanisms are in place to support states with low deworming coverage?

**Validation and Accuracy of Administrative Data**

1. What processes are used at the national level to validate State-reported data for Vitamin A and deworming coverage?
2. How reliable do you consider the administrative data compared to post-event coverage surveys?

**National View on Coverage of Other Health and Nutrition Services**

1. How does the government ensure that other health and nutrition services are integrated with Vitamin A and deworming initiatives for children and women of reproductive age?
   1. What challenges have been encountered in expanding these services?

**Policy and Strategic Influence**

1. How do national policies currently support or hinder the delivery of vitamin A supplementation and deworming programs across states?
2. Are there any national-level barriers or challenges that affect the consistency and effectiveness of these services across different regions?

**Resource Allocation and Distribution**

1. How are resources and supplies (e.g., vitamin A capsules, deworming tablets) distributed across states, and what improvements could ensure equitable access?
2. How is data collected at the state level utilized to inform national decisions on program funding and resource distribution?

**Stakeholder Collaboration**

1. How do national and state-level health authorities collaborate to overcome challenges in service delivery for vitamin A and deworming?
2. What has been the role of national health agencies and partners in supporting states to enhance uptake of these health services?

**Strategies and Recommendations**

1. What strategies do you think are most effective for improving the overall national coverage of vitamin A supplementation and deworming? Probe for Immediate and long-term strategies, partnership, policy recommendation (Any policy changes at the state or national level that could help increase the reach of these programs)
2. From a national perspective, what additional measures could be introduced to ensure sustainable improvement in the reach and impact of these programs?

**End of Interview**

Thank Participant for their time
